# Supplementary material for: School-Based Physical Activity Interventions in Children and Adolescents: A Systematic Review
Source: PubMed Central journal article supplement (PMC7037705; doi:10.3390/ijerph17030999), 2020-02-05
Supplement: ijerph-17-00999-s001.pdf [file ijerph-17-00999-s001.pdf]

Supplementary Material

# School-based Physical Activity Interventions in Children and Adolescents: A Systematic Review

Mikel Vaquero-Solís <sup>1</sup>, Damián Iglesias Gallego <sup>1,\*</sup>, Miguel Ángel Tapia-Serrano <sup>1</sup>,  
 Juan J. Pulido <sup>2,3</sup> and Pedro Antonio Sánchez-Miguel <sup>1,\*</sup>

<sup>1</sup> Department of Didactics of Music, Plastic and Body Expression, Teacher Training College, University of Extremadura, Cáceres (Spain), Extremadura, 10003, Spain; mivaquero@alumnos.unex.es (M.V.-S); matapiase@unex.es (M.A.T.-S.)

<sup>2</sup> University of Extremadura, Faculty of Sport Science, Cáceres (Spain), Extremadura, 10003, Spain; jjpulido@unex.es (J.J.P.)

<sup>3</sup> Faculty of Human Kinetics, University of Lisbon, Lisbon 1499-002, Portugal

\* Correspondence: pesanchezm@unex.es (P.A.S.-M.); diglesia@unex.es (D.I.G) Tel.: (+34-927-257-647)

Supplementary Table S1

| Theoretical Concepts | Intervention Variables | Study (Year)[Reference]           | Sizes Effects × time ( $\eta^2$ ; $\eta^2p$ ; Clif delta; Cohen's $d$ ; $R^2$ ) | Sizes Effects Between Groups ( $\eta^2$ , Clif delta, Cohen's $d$ ; $R^2$ ) |
|----------------------|------------------------|-----------------------------------|---------------------------------------------------------------------------------|-----------------------------------------------------------------------------|
| Motivation           | Intrinsic Regulation   | Cuevas et al. (2016)[48]          | $\eta^2 = 0.075$                                                                |                                                                             |
|                      |                        | Fernández-Rio et al. (2016)[49]   | Cohen's $d = 0.12$                                                              |                                                                             |
|                      |                        | Franco and Coteron (2017)[50]     | Cliff's delta = 0.10                                                            |                                                                             |
|                      |                        | Lubans et al. (2016)[64]          | Cohen's $d = 0.53$                                                              |                                                                             |
|                      |                        | Nicaise et al. (2013)[65]         | Cohen's $d = 0.02$                                                              |                                                                             |
|                      |                        | González-Cutre et al. (2016)[53]  | Cliff's delta = 0.51                                                            |                                                                             |
|                      |                        | Sevil et al. (2015)[74]           |                                                                                 | $\eta^2p = 0.62$                                                            |
|                      |                        | Sevil et al. (2016)[75]           |                                                                                 | $\eta^2p = 0.061$                                                           |
|                      |                        | Sevil et al. (2018)[76]           |                                                                                 | $\eta^2p = 0.165$                                                           |
|                      | Integrated Regulation  | González-Cutre et al. (2016) [54] | Cliff's delta = 0.36                                                            |                                                                             |
|                      | Identified Regulation  | Amado et al. (2014)[21]           | $\eta^2 = 0.08$                                                                 |                                                                             |
|                      |                        | Cuevas et al. (2016)[48]          | $\eta^2 = 0.056$                                                                |                                                                             |
|                      |                        | Fernández-Rio et al. (2016)[49]   | Cohen's $d = 0.17$                                                              |                                                                             |
|                      |                        | González-Cutre et al. (2014)[53]  | Cliff's delta = 0.54                                                            |                                                                             |

Supplementary Table S1. Cont.

|                   |                        |                                   |                      |                    |
|-------------------|------------------------|-----------------------------------|----------------------|--------------------|
|                   |                        | González-Cutre et al. (2016)[55]  | Cliff's delta = 0.53 |                    |
|                   |                        | Lubans et al. (2016)[64]          | Cohen's d = 0.40     |                    |
|                   |                        | Nicaise et al. (2014)[65]         | Cohen's d = 0.26     |                    |
|                   |                        | Sevil et al., (2016)[75]          |                      | $\eta^2 p = 0.034$ |
|                   |                        | Sevil et al. (2018)[76]           |                      | $\eta^2 p = 0.092$ |
|                   | Autonomous Motivation  | Bechter et al. (2019)[44]         | Cohen's d = 0.11     |                    |
|                   |                        | Cuevas et al. (2016)[48]          | $\eta^2 = 0.050$     |                    |
|                   |                        | Perlman et al. (2013)[67]         | $\eta^2 p = 0.157$   |                    |
|                   |                        | Piipari et al. (2018)[68]         | $\eta^2 = 0.06$      |                    |
|                   |                        | Riiser et al. (2014)[40]          | Cohen's d = 0.11     |                    |
|                   |                        | Sánchez-Oliva et al. (2017)[73]   | $\eta^2 = 0.08$      |                    |
|                   |                        | Sevil et al. (2015)[74]           |                      | $\eta^2 p = 0.62$  |
|                   | Interjected Regulation | González-Cutre et al. (2014)[53]  | Cliff's delta = 0.38 |                    |
|                   |                        | Lubans et al. (2016)[64]          | Cohen's d = 0.56     |                    |
|                   | External Regulation    | Fernández-Rio et al. (2016)[49]   | Cohen's d = 0.03     |                    |
|                   |                        | González -Cutre et al. (2014)[53] | Cliff's delta = 0.20 |                    |
|                   |                        | Lubans et al. (2016)[64]          | Cohen's d = 0.49     |                    |
|                   |                        | Nicaise et al. (2014)[65]         | Cohen's d = 0.32     |                    |
|                   | Controlled Motivation  | Sánchez-Oliva et al. (2017)[73]   | ( $\eta^2 = 0.06$ )  |                    |
|                   | Amotivation            | Cheon et al. (2016)[22]           | N/A                  |                    |
|                   |                        | Kanlanyanee et al. (2017)[59]     | N/A                  |                    |
| Need satisfaction | Competence             | Bechter et al. (2019)[44]         | Cohen's d = 0.08     |                    |
|                   |                        | Franco and Coteron (2017)[50]     | Cliff's delta = 0.38 |                    |
|                   |                        | Sevil et al. (2015)[74]           | $\eta^2 p = 0.034$   |                    |
|                   |                        | Sevil et al. (2016)[75]           |                      | $\eta^2 p = 0.055$ |
|                   |                        | Sevil et al. (2018)[76]           | $\eta^2 p = 0.149$   |                    |
|                   |                        | Tilga et al. (2019) [80]          | $\eta^2 p = 0.03$    |                    |
|                   | Autonomy               | Amado et al. (2014)[21]           | $\eta^2 = 0.08$      |                    |
|                   |                        | Bechter et al. (2019)[44]         | Cohen's d = 0.30     |                    |
|                   |                        | Franco and Coteron (2017)[80]     | Cliff's delta = 0.31 |                    |
|                   |                        | González-Cutre et al. (2016)[54]  | Cliff's delta = 0.45 |                    |

**Supplementary Table S1. Cont.**

|                  |             |                                  |                      |                    |
|------------------|-------------|----------------------------------|----------------------|--------------------|
|                  |             | Sánchez-Oliva et al. (2017)[73]  | ( $\eta^2 = 0.08$ )  |                    |
|                  |             | Sevil et al. (2016)[75]          |                      | $\eta^2 p = 0.022$ |
|                  |             | Sevil et al. (2018)[76]          |                      | $\eta^2 p = 0.160$ |
|                  |             | Shanon et al. (2018)[77]         | N/A                  |                    |
|                  |             | Tilga et al. (2019)[80]          | $\eta^2 p = 0.04$    |                    |
|                  | Relatedness | Bechter et al. (2019)[44]        | Cohen's $d = 0.22$   |                    |
|                  |             | González-Cutre et al. (2016)[54] | Cliff's delta = 0.53 |                    |
|                  |             | Tilga et al. (2019)[80]          | $\eta^2 p = 0.03$    |                    |
|                  |             | Cheon et al. (2018)[47]          | Cohen's $d = 0.56$   |                    |
| Need support     | Competence  | Abos et al. (2016)[41]           | $\eta^2 p = 0.177$   |                    |
|                  |             | Fu et al. (2016)[51]             | N/A                  |                    |
|                  |             | Perlman et al. (2013)[67]        | $\eta^2 p = 0.131$   |                    |
|                  |             | Sevil et al. (2015)[74]          | $\eta^2 p = 0.055$   |                    |
|                  |             | Sevil et al. (2016)[75]          |                      | $\eta^2 p = 0.62$  |
|                  |             | Sevil et al. (2018)[76]          |                      | $\eta^2 p = 0.088$ |
|                  | Autonomy    | Cheon et al. (2018)[47]          | Cohen's $d = 0.99$   |                    |
|                  |             | González-Cutre et al. (2014)[53] | Cliff's delta = 0.44 |                    |
|                  |             | Piipari et al. (2018)[68]        | $\eta^2 = 0.09$      |                    |
|                  |             | Sánchez-Oliva et al. (2017)[73]  | ( $\eta^2 = 0.08$ )  |                    |
|                  |             | Sevil et al. (2015)[74]          |                      | $\eta^2 p = 0.62$  |
|                  |             | Sevil et al. (2018)[76]          |                      | $\eta^2 p = 0.088$ |
|                  |             | Shanon et al. (2018)[77]         | N/A                  |                    |
|                  | Relatedness | Sánchez-Oliva et al. (2017)[73]  | ( $\eta^2 = 0.05$ )  |                    |
|                  |             | Sevil et al. (2015)[74]          |                      | $\eta^2 p = 0.62$  |
|                  |             | Bronikowski et al. (2013)[46]    | $\eta^2 = 0.58$      |                    |
| Need frustration | Competence  | Cuevas et al. (2016)[48]         | $\eta^2 = 0.031$     |                    |
|                  |             | Sevil et al. (2018)[76]          |                      | $\eta^2 p = 0.209$ |
|                  | Autonomy    | Sevil et al. (2018)[76]          |                      | $\eta^2 p = 0.192$ |
|                  |             | Tilga et al. (2019)[80]          | $\eta^2 p = 0.04$    |                    |

Supplementary Table S1. Cont.

|                                  |                                   |                                                                                                                                                                      |                                                                                      |                                          |
|----------------------------------|-----------------------------------|----------------------------------------------------------------------------------------------------------------------------------------------------------------------|--------------------------------------------------------------------------------------|------------------------------------------|
|                                  | Relatedness                       | Cuevas et al. (2016)[48]<br>Sevil et al. (2018)[76]                                                                                                                  | $\eta^2 = 0.037$                                                                     | $\eta^2 p = 0.062$                       |
|                                  | Frustration                       | Cheon et al., (2018)[47]                                                                                                                                             | Cohen's $d = 0.63$                                                                   |                                          |
| Achievement Goal Theory          | Task-oriented Climate             | Bortoli et al. (2015)[45]                                                                                                                                            | Cohen's $d = 0.80$                                                                   |                                          |
|                                  |                                   | Grasten et al. (2015)[55]                                                                                                                                            | $R^2 = 0.37$                                                                         |                                          |
|                                  |                                   | Kokonen et al. (2018)[60]                                                                                                                                            | $\eta^2 = 0.05$                                                                      |                                          |
|                                  |                                   | Rokka et al. (2019)[72]                                                                                                                                              | $\eta^2 = 0.04$                                                                      |                                          |
|                                  |                                   | Sevil et al. (2016)[75]                                                                                                                                              |                                                                                      | $\eta^2 p = 0.090$                       |
|                                  |                                   | Sevil et al. (2018)[76]                                                                                                                                              |                                                                                      | $\eta^2 p = 0.178$                       |
|                                  | Ego-oriented Climate              | Bortoli et al. (2015)[45]<br>Grasten et al. (2015)[55]<br>Kokonen et al. (2018)[60]<br>Rokka et al. (2019)[72]<br>Sevil et al. (2016)[75]<br>Sevil et al. (2018)[76] | Cohen's $d = 0.55$<br>$R^2 = 0.16$<br>$\eta^2 = 0.02$<br>$\eta^2 = 0.06$             | $\eta^2 p = 0.074$<br>$\eta^2 p = 0.036$ |
| Behaviours                       | Intention to be Physically Active | Abos et al. (2016)[41]                                                                                                                                               | $\eta^2 p = 0.365$                                                                   |                                          |
|                                  |                                   | Cuevas et al. (2016)[48]                                                                                                                                             | $\eta^2 = 0.015$                                                                     |                                          |
|                                  |                                   | Franco and Coteron (2017)[50]                                                                                                                                        | Cliff's delta = 0.22                                                                 |                                          |
|                                  |                                   | González-Cutre et al. (2014)[53]                                                                                                                                     | Cliff's delta = 0.45                                                                 |                                          |
|                                  |                                   | Rhodes et al. (2018)[70]                                                                                                                                             | $R^2 = 0.41$                                                                         |                                          |
|                                  |                                   | Sánchez-Oliva et al. (2019)[73]                                                                                                                                      | ( $\eta^2 = 0.04$ )                                                                  |                                          |
|                                  |                                   | Sevil et al. (2018)[76]                                                                                                                                              |                                                                                      | $\eta^2 p = 0.064$                       |
|                                  | Sedentary                         | Girelli et al. (2016)[52]<br>Lonsdale et al. (2013)[62]<br>Lonsdale et al. (2017)[63]<br>Lubans et al. (2016)[64]                                                    | $\eta^2 p = 0.05$<br>Cohen's $d = 0.72$<br>Cohen's $d = 0.13$<br>Cohen's $d = -32.2$ |                                          |
|                                  | Lifestyle                         | Girelli et al. (2016)[52]                                                                                                                                            | $\eta^2 p = 0.06$                                                                    |                                          |
|                                  | Physical Activity                 | Bronikowski et al. (2013)[46]                                                                                                                                        | $\eta^2 = 0.05$                                                                      |                                          |
| Fu et al. (2016)[51]             |                                   | N/A                                                                                                                                                                  |                                                                                      |                                          |
| González-Cutre et al. (2014)[53] |                                   | Cliff's delta = 0.53                                                                                                                                                 |                                                                                      |                                          |

**Supplementary Table S1. Cont.**

|                          |                           |                                   |                                |                          |
|--------------------------|---------------------------|-----------------------------------|--------------------------------|--------------------------|
|                          |                           | González-Cutre et al. (2016)[54]  | Cliff's delta = 0.27           |                          |
|                          |                           | Grasten et al. (2018)[56]         | R <sup>2</sup> = 0.34          |                          |
|                          |                           | Grasten et al. (2015)[55]         | $\eta^2 = 0.020$               |                          |
|                          |                           | How et al. (2013)[58]             | $\eta^2 p = 0.20$              |                          |
|                          |                           | Lonsdale et al. (2013)[62]        | Cohen's <i>d</i> = 0.45        |                          |
|                          |                           | Lonsdale et al. (2017)[63]        | Cohen's <i>d</i> = 0.85        |                          |
|                          |                           | Nation Grainger et al. (2017)[79] | Small size < 0.01              |                          |
|                          |                           | Nicaise et al. (2014)[65]         | Cohen's <i>d</i> = 0.07        |                          |
|                          |                           | Piipari et al. (2018)[68]         | $\eta^2 = 0.06$                |                          |
|                          |                           | Riiser et al. (2014)[40]          | Cohen's <i>d</i> = 0.55        |                          |
|                          |                           | Shanon et al. (2018)[77]          | N/A                            |                          |
|                          | Attitude                  | Abos et al. (2016)[41]            | $\eta^2 p = 0.251$             |                          |
|                          |                           | Fernández-Rio et al. (2016)[49]   | Cohen's <i>d</i> = 0.05        |                          |
|                          |                           | Girelli et al. (2016)[52]         | $\eta^2 p = 0.04$              |                          |
|                          |                           | Gonzalez-Cutre et al. (2014)[53]  | Cliff's delta = 0.34           |                          |
|                          |                           | González-Cutre et al. (2016)[54]  | Cliff's delta = 0.34           |                          |
|                          |                           | Hajar et al. (2019)[57]           | $\eta^2 = 0.043$               |                          |
|                          |                           | Sevil et al. (2015)[74]           |                                | $\eta^2 p = 0.62$        |
|                          |                           | Tilga et al. (2019)[80]           | $\eta^2 p = 0.06$              |                          |
|                          | Effort                    | Bechter et al. (2019)[44]         | Cohen's <i>d</i> = 0.30        |                          |
|                          |                           | Rokka et al. (2019)[72]           | $\eta^2 = 0.09$                |                          |
|                          | Behavioral Control        | Perceived                         | García-Calvo et al. (2015)[23] | N/A                      |
|                          |                           |                                   | Laroche et al. (2015)[61]      | N/A                      |
|                          | Engagement                |                                   | Cheon et al. (2016)[22]        |                          |
| Anthropometric variables | Cardiorespiratory Fitness |                                   | Lubans et al. (2016)[64]       | Cohen's <i>d</i> = 5.9   |
|                          | BMI/Adiposity             |                                   | Lubans et al. (2016)[64]       | N/A                      |
|                          |                           |                                   | Riiser et al. (2014)[40]       | Cohen's <i>d</i> = -0.70 |
|                          |                           |                                   | Sebire et al. (2016)[39]       | N/A                      |
|                          |                           |                                   | Smith et al. (2016)[78]        | N/A                      |

Supplementary Table S1. Cont.

|                        |                         |                                  |                      |                    |
|------------------------|-------------------------|----------------------------------|----------------------|--------------------|
| Psychosocial variables | Body Image              | Riiser et al. (2014)[40]         | Cohen's $d = 0.56$   |                    |
|                        | Quality Life            | Riiser et al. (2014)[40]         | Cohen's $d = 0.45$   |                    |
|                        |                         | Shanon et al. (2018)[77]         | $R^2 = 0.21$         |                    |
|                        | Well-being              | Babic et al. (2016)[43]          | Small size < 0.01    |                    |
|                        | Funny/Enjoy             | Abos et al. (2016)[41]           | $\eta^2 p = 0.155$   |                    |
|                        |                         | Franco and Coteron (2017)[50]    | Cliff's delta = 0.40 |                    |
|                        |                         | Fu et al. (2016)[51]             | N/A                  |                    |
|                        |                         | Hajar et al. (2019)[57]          | $\eta^2 = 0.043$     |                    |
|                        |                         | Nicaise et al. (2014)[65]        | Cohen's $d = 0.99$   |                    |
|                        |                         | Perlman et al. (2013)[67]        | $\eta^2 p = 0.122$   |                    |
|                        |                         | Sevil et al. (2015)[74]          |                      | $\eta^2 p = 0.62$  |
|                        |                         | Sevil et al. (2016)[75]          |                      | $\eta^2 p = 0.070$ |
|                        |                         | Sevil et al. (2018)[76]          |                      | $\eta^2 p = 0.180$ |
|                        | Boredom                 | Cuevas et al. (2016)[48]         | $\eta^2 = 0.050$     |                    |
|                        |                         | Sevil et al. (2015)[74]          |                      | $\eta^2 p = 0.31$  |
|                        | Usefulness              | Amado et al. (2017)[42]          | N/A                  |                    |
|                        |                         | Abos et al. (2016)[41]           | $\eta^2 p = 0.111$   |                    |
|                        |                         | Bechter et al. (2019)[44]        | Cohen's $d = 0.41$   |                    |
|                        | Self-efficacy           | Bronikowski et al. (2013)[46]    | $\eta^2 = 0.10$      |                    |
|                        |                         | Tilga et al. (2019)[80]          | $\eta^2 p = 0.04$    |                    |
|                        | Appearance              | Hajar et al. (2019)[57]          | $\eta^2 = 0.043$     |                    |
|                        | Psychological Condition | Hajar et al. (2019)[57]          | $\eta^2 = 0.043$     |                    |
|                        |                         | Tilga et al. (2019)[80]          | $\eta^2 p = 0.09$    |                    |
|                        | Subjective Norms        | González-Cutre et al. (2014)[53] | Cliff's delta = 0.34 |                    |
|                        |                         | Laroche et al. (2019)[61]        | $R^2 = 0.09$         |                    |
|                        | Social Support          | Robbins et al., (2019)[71]       | $R = 0.28$           |                    |
|                        | Prosocial Behavior      | Abos et al. (2016)[41]           | $\eta^2 p = 0.144$   |                    |
|                        |                         | Bortoli et al. (2015)[45]        | Cohen's $d = 0.45$   |                    |
|                        |                         | Cheon et al. (2018)[47]          | Cohen's $d = 0.56$   |                    |
|                        | Antisocial Behavior     | Bortoli et al. (2015)[45]        | Cohen's $d = 0.64$   |                    |
|                        |                         | Cheon et al. (2018)[47]          | Cohen's $d = 0.72$   |                    |
